# Supplementary material
Source: Springer Nature journal article supplement (https://www.springermedizin.de/resource/supplementary/12968_2008_41_MOESM3_ESM.pdf/9577856)
Supplement: MOESM3 [file 9577856]

Segments with  
WMA at rest  
N = 1227

EDWT < 5.5 mm  
N = 551 (44.9%)

EDWT  $\geq$  5.5 mm  
N = 676 (55.1%)

**LGE**  
area  $\geq$  25%  
N = 404 (73.3%)

**LGE**  
area < 25%  
N = 147 (26.7%)

**LGE**  
area  $\geq$  25%  
N = 335 (49.6%)

**LGE**  
area < 25%  
N = 341 (50.4%)

Not improved  
N = 353 (87.4%)

Improved  
N = 51 (12.6%)

Not improved  
N = 54 (36.7%)

Improved  
N = 93 (66.3%)

Not improved  
N = 263 (78.5%)

Improved  
N = 72 (21.5%)

Not improved  
N = 76 (22.3%)

Improved  
N = 265 (77.7%)
